# Supplementary material
Source: PubMed Central journal article supplement (PMC3346354)
Supplement: supp_78.10.3685_AEM07884-11_TableS1.pdf [file supp_78.10.3685_AEM07884-11_TableS1.pdf]

| ORF | location               | Size (aa) | Most significant match (organism, E value); top match showing possible function                                                                   | Domain/s <sup>a</sup>                                                    |
|-----|------------------------|-----------|---------------------------------------------------------------------------------------------------------------------------------------------------|--------------------------------------------------------------------------|
| 1   | 43-456                 | 137       | putative terminase small subunit ( <i>Staphylococcus aureus</i> , 1e-15)                                                                          | IPR005335, terminase small subunit                                       |
| 2   | 559-1800               | 413       | phage terminase, large subunit ( <i>Clostridium perfringens</i> , 2e-120)                                                                         | IPR006437, IPR006701 phage terminase, large subunit, PBSX                |
| 3   | 1811-3304              | 497       | phage portal protein, SPP1 family ( <i>Fusobacterium peridonticum</i> , 4e-79)                                                                    | IPR006428, IPR021145, bacteriophage portal protein, SPP1 family          |
| 4   | 3189-3917              | 242       | putative phage minor head protein ( <i>Listeria seeligeri</i> , 1e-19)                                                                            | IPR006528, phage putative head morphogenesis protein, SPP1 Gp7           |
| 5   | 3998-4615              | 205       | hypothetical protein ( <i>Bacillus</i> sp., 3e-26); putative ribonuclease phage-like protein ( <i>Bacillus licheniformis</i> , 9e-24)             |                                                                          |
| 6   | 4637-5539              | 300       | putative major head protein ( <i>Lacococcus lactis</i> , 2e-39)                                                                                   |                                                                          |
| 7   | 5622-5939              | 105       | phage protein ( <i>Bacillus cereus</i> , 4e-08)                                                                                                   | IPR021146 bacteriophage QLRG family, putative DNA packaging              |
| 8   | 5940-6263              | 107       | hypothetical protein ( <i>Clostridium thermocellum</i> , 3.3)                                                                                     |                                                                          |
| 9   | 6244-6588              | 114       | hypothetical protein ( <i>Abiotrophia defectiva</i> 1.6)                                                                                          |                                                                          |
| 10  | 6572-6967              | 131       | transketolase ( <i>Moraxella catarrhalis</i> , 1)                                                                                                 |                                                                          |
| 11  | 7010-7447              | 145       | hypothetical protein ( <i>Paenibacillus larvae</i> , 5e-25); phage major tail protein, TP901-1 family ( <i>Bacillus cellulosilyticus</i> , 5e-20) | IPR011855 phage major tail protein TP901-1                               |
| 12  | 7467-7820              | 117       | hypothetical protein ( <i>Haemophilus influenzae</i> , 3.0)                                                                                       |                                                                          |
| 13  | 7910-8122              | 70        | DNA topoisomerase III ( <i>Saccharophagus degradans</i> , 4.4)                                                                                    |                                                                          |
| 14  | 8126-10324             | 732       | phage protein ( <i>Clostridium ljungdahlii</i> , 2e-54); phage tape measure protein ( <i>Finegoldia magna</i> , 2e-53)                            | IPR010090 phage tail tape measure protein TP901, core region             |
| 15  | 10325-11008            | 227       | hypothetical protein ( <i>Clostridium saccharolyticum</i> , 8e-14); phage tail protein ( <i>Coprococcus catus</i> , 4e-13)                        | IPR008841 Siphovirus tail component                                      |
| 16  | 11010-12455            | 481       | hypothetical protein ( <i>Clostridium botulinum</i> , 4e-38); phage tail fibre protein ( <i>Clostridium kluyveri</i> , 9e-13)                     | SSF47162 Apolipoprotein                                                  |
| 17  | 12457-15135            | 892       | probable transcriptional regulator-related protein ( <i>Clostridium botulinum</i> , 1e-135)                                                       |                                                                          |
| 18  | 15149-15340            | 63        | serine-type D-Ala-D-Ala carboxypeptidase ( <i>Clostridium botulinum</i> , 0.024)                                                                  |                                                                          |
| 19  | 15342-15494            | 50        | hypothetical protein ( <i>Clostridium botulinum</i> , 2e-7)                                                                                       | IPR010022 Phage uncharacterised protein XkdX                             |
| 20  | 15507-17474            | 655       | phage minor structural protein ( <i>Listeria seeligeri</i> , 4e-30)                                                                               | pfam06605 Prophage_tail                                                  |
| 21  | 17511-17675            | 54        | no hits                                                                                                                                           |                                                                          |
| 22  | 17678-18472            | 264       | N-acetylmuramoyl-L-alanine amidase ( <i>Clostridium botulinum</i> , 6e-53)                                                                        | IPR002508 cell wall hydrolase/autolysin, catalytic transmembrane regions |
| 23  | 18482-18760            | 92        | Imm ( <i>Clostridium novyi</i> , 4e-04)                                                                                                           |                                                                          |
| 24  | 18837-19193 complement | 118       | malonyl CoA-acyl carrier protein transacylase ( <i>Veillonella</i> sp., 3.7)                                                                      |                                                                          |

|    |             |     |                                                                                                                                            |                                                                                                                                                                                                                   |
|----|-------------|-----|--------------------------------------------------------------------------------------------------------------------------------------------|-------------------------------------------------------------------------------------------------------------------------------------------------------------------------------------------------------------------|
| 25 | 19398-19511 | 37  | no hits                                                                                                                                    |                                                                                                                                                                                                                   |
| 26 | 19685-20296 | 203 | hypothetical phage protein ( <i>Clostridium</i> phage phiCTP1, 1e-13)                                                                      |                                                                                                                                                                                                                   |
| 27 | 20523-22646 | 707 | hypothetical protein (Lachnospiraceae bacterium, 2e-163); DNA polymerase I ( <i>Eubacterium eligens</i> , 1e-160)                          | IPR001098, IPR002298, DNA-directed DNA polymerase A; IPR002562 3'-5' exonuclease; IPR012337 Ribonuclease H-like IPR022765 Dna2/Cas4, DUF83                                                                        |
| 28 | 22714-23553 | 279 | hypothetical protein ( <i>Eubacterium eligens</i> , 7e-51); RecB ( <i>Streptococcus</i> phage Dp-1, 1e-20)                                 |                                                                                                                                                                                                                   |
| 29 | 23553-24002 | 149 | penicillin-binding protein-related factor A, putative recombinase ( <i>Eubacterium rectale</i> , 5e-25)                                    | IPR011335 restriction endonuclease, type II-like                                                                                                                                                                  |
| 30 | 23992-24222 | 76  | no hits                                                                                                                                    |                                                                                                                                                                                                                   |
| 31 | 24238-24579 | 113 | hypothetical protein ( <i>Clostridium botulinum</i> , 2e-19)                                                                               |                                                                                                                                                                                                                   |
| 32 | 24653-24871 | 72  | hypothetical protein ( <i>Plasmodium chabaudi chabaudi</i> , 7)                                                                            |                                                                                                                                                                                                                   |
| 33 | 24864-25859 | 331 | RecA protein (Lachnospiraceae bacterium, 3e-80)                                                                                            | IPR003593 ATPase, AAA+ type, core; IPR013765, IPR020587, IPR020588, IPR023400 DNA recombination and repair protein RecA                                                                                           |
| 34 | 25861-26040 | 59  | no hits                                                                                                                                    |                                                                                                                                                                                                                   |
| 35 | 26030-26353 | 107 | hypothetical protein ( <i>Streptococcus</i> phage Dp-1, 1e-18)                                                                             |                                                                                                                                                                                                                   |
| 36 | 26368-26598 | 76  | esterase D/formylglutathione hydrolase ( <i>Rattus norvegicus</i> , 5.2)                                                                   |                                                                                                                                                                                                                   |
| 37 | 26600-26812 | 70  | aldehyde dehydrogenase ( <i>Burkholderia ambifaria</i> , 5)                                                                                |                                                                                                                                                                                                                   |
| 38 | 26812-26991 | 59  | no hits                                                                                                                                    |                                                                                                                                                                                                                   |
| 39 | 27102-27614 | 170 | hypothetical protein ( <i>Ralstonia pickettii</i> , 1.1)                                                                                   |                                                                                                                                                                                                                   |
| 40 | 27616-27738 | 40  | no hits                                                                                                                                    |                                                                                                                                                                                                                   |
| 41 | 27740-27868 | 42  | no hits                                                                                                                                    |                                                                                                                                                                                                                   |
| 42 | 27880-29583 | 567 | PhoH family protein ( <i>Verrucosipora maris</i> , 4e-65); replicative DNA helicase ( <i>Burkholderia cenocepacia</i> , 3e-60)             | IPR004042, IPR006142 intein DOD homing endonuclease; IPR007868 Hom-end-associated Hint; IPR013317 chromosomal replication control, initiator (DnaA)/regulator (Hda) IPR007694 DNA helicase, DnaB-like, C-terminal |
| 43 | 29576-30823 | 415 | replicative DNA helicase ( <i>Eubacterium eligens</i> , 2e-78)                                                                             |                                                                                                                                                                                                                   |
| 44 | 30861-31031 | 56  | hypothetical protein ( <i>Clostridium botulinum</i> , 1e-15)                                                                               |                                                                                                                                                                                                                   |
| 45 | 31032-31232 | 66  | aromatic amino acid aminotransferase ( <i>Ruegeria</i> sp., 8.4)                                                                           |                                                                                                                                                                                                                   |
| 46 | 31244-33331 | 695 | hypothetical protein ( <i>Clostridium hylemonae</i> , 3e-141); anaerobic ribulose triphosphate reductase ( <i>Clostridium</i> sp., 2e-140) | IPR005144 ATP-cone; IPR012833 ribonucleoside-triphosphate reductase, anaerobic                                                                                                                                    |
| 47 | 33507-33854 | 115 | NAD-dependent DNA ligase <i>Streptococcus</i> phage DP-1, 2e-14                                                                            | COG0272 NAD-dependent DNA ligase                                                                                                                                                                                  |
| 48 | 33867-34244 | 125 | aldehyde dehydrogenase (NAD(+)) ( <i>Corynebacterium striatum</i> , 0.43)                                                                  |                                                                                                                                                                                                                   |
| 49 | 34244-34723 | 159 | anaerobic NTP reductase, small subunit                                                                                                     | IPR012837 ribonucleoside-                                                                                                                                                                                         |

|    |                        |     |                                                                                                                                                                               |                                                 |
|----|------------------------|-----|-------------------------------------------------------------------------------------------------------------------------------------------------------------------------------|-------------------------------------------------|
|    |                        |     | ( <i>Enterobacteria</i> phage Felix 01, 1e-30)                                                                                                                                | triphosphate reductase activity, anaerobic      |
| 50 | 34711-35601            | 296 | DNA primase ( <i>Eubacterium eligens</i> , 2e-33)                                                                                                                             | IPR002694 zinc finger, CHC2-type                |
| 51 | 35598-35789            | 63  | GG21719 ( <i>Drosophila erecta</i> , 6)                                                                                                                                       |                                                 |
| 52 | 35789-36127            | 112 | nuclear pore complex subunit <i>Saccharomyces cerevisiae</i> 0.43                                                                                                             |                                                 |
| 53 | 36129-36620            | 163 | hypothetical phage protein ( <i>Clostridium</i> phage phiCTP1, 5e-36); putative deoxyuridine 5'-triphosphate nucleotidohydrolase ( <i>Bacillus amyloliquefaciens</i> , 1e-29) |                                                 |
| 54 | 36731-37669            | 312 | group I glycosyl transferase ( <i>Chloroflexus aggregans</i> , 0.45)                                                                                                          |                                                 |
| 55 | 37669-38292            | 207 | hypothetical protein ( <i>Clostridium botulinum</i> , 3e-11)                                                                                                                  |                                                 |
| 56 | 38285-38581            | 98  | RNA polymerase, sigma-factor ( <i>Algoriphagus</i> sp., 0.32)                                                                                                                 |                                                 |
| 57 | 38548-38736            | 62  | UvrABC system protein ( <i>Streptomyces clavuligerus</i> , 1.1)                                                                                                               |                                                 |
| 58 | 38754-39509            | 251 | hypothetical protein ( <i>Staphylococcus</i> phage K, 6e-18); nucleoside 2-deoxyribosyltransferase family ( <i>Clostridium botulinum</i> , 1e-08)                             | pfam05014, nucleoside 2-deoxyribosyltransferase |
| 59 | 39509-39772            | 87  | hypothetical protein ( <i>Meyerozyma guilliermondii</i> , 3.4)                                                                                                                |                                                 |
| 60 | 39765-40187            | 140 | n/a ( <i>Ectocarpus siliculosus</i> , 2)                                                                                                                                      |                                                 |
| 61 | 40187-40438            | 83  | hypothetical protein ( <i>Clostridium botulinum</i> , 2e-6)                                                                                                                   | pfam04193 PQ loop repeat                        |
| 62 | 40489-40854            | 121 | intron-associated endonuclease ( <i>Enterobacteria</i> phage T4, 2e-6)                                                                                                        | IPR000305 excinuclease ABC, C subunit           |
| 63 | 40900-41133            | 77  | sugar diacid utilization factor ( <i>Lactobacillus farciminis</i> , 6)                                                                                                        |                                                 |
| 64 | 41272-41421            | 49  | no hits                                                                                                                                                                       |                                                 |
| 65 | 41448-41720            | 90  | histidine sensor kinase protein ( <i>Aquifex aeolicus</i> , 6.6)                                                                                                              |                                                 |
| 66 | 41952-42125            | 57  | no hits                                                                                                                                                                       |                                                 |
| 67 | 42188-42358            | 56  | no hits                                                                                                                                                                       |                                                 |
| 68 | 42402-42617            | 71  | hypothetical protein ( <i>Paramecium tetraurelia</i> , 1.5)                                                                                                                   |                                                 |
| 69 | 42604-42750            | 48  | no hits                                                                                                                                                                       |                                                 |
| 70 | 42851-43075            | 74  | no hits                                                                                                                                                                       |                                                 |
| 71 | 43950-44078 complement | 42  | no hits                                                                                                                                                                       |                                                 |
| 72 | 44090-44200 complement | 36  | no hits                                                                                                                                                                       |                                                 |
| 73 | 44345-44698 complement | 117 | possible glutamate synthase (NADPH) ( <i>Oribacterium sinus</i> , 8.9)                                                                                                        |                                                 |
| 74 | 44726-44821 complement | 31  | no hits                                                                                                                                                                       |                                                 |
| 75 | 44858-45409            | 185 | hypothetical protein ( <i>Shewanella</i>                                                                                                                                      |                                                 |

|    |                           |     |                                                                                           |                                           |
|----|---------------------------|-----|-------------------------------------------------------------------------------------------|-------------------------------------------|
| 76 | complement<br>45409-45747 | 112 | <i>amazonensis</i> , 5.6)<br>phage protein ( <i>Clostridium papyrosolvens</i> ,<br>5e-09) | IPR010359, DUF955                         |
| 77 | complement<br>45820-45990 | 56  | no hits                                                                                   |                                           |
| 78 | complement<br>45993-46148 | 51  | no hits                                                                                   |                                           |
| 79 | complement<br>46138-46296 | 52  | no hits                                                                                   |                                           |
| 80 | complement<br>46311-46469 | 52  | no hits                                                                                   |                                           |
| 81 | complement<br>46523-46762 | 79  | hypothetical protein ( <i>Nectria<br/>haematococca</i> , 7.7)                             |                                           |
| 82 | complement<br>46783-47124 | 113 | transposase ( <i>Burkholderia rhizoxinica</i> ,<br>0.74)                                  | pfam09339 IciR helix-turn-helix<br>domain |

<sup>a</sup> Domain or family assignments from InterProScan (IPR), pfam or Superfamily (SSF).

TABLE S1. ORF analysis of the  $\Phi$ 8074-B1 genome.
